# Supplementary material for: Severity of COVID-19 among solid organ transplant recipients in Canada, 2020–2021: a prospective, multicentre cohort study
Source: PubMed Central journal article supplement — CMAJ. 2022 Aug 29;194(33):E1155–63. doi: 10.1503/cmaj.220620 (PMC9435532; doi:10.1503/cmaj.220620), 2022-08-29
Supplement: 220260-image-1-at.pdf [file 220260-image-1-at.pdf]

**Table S1. Patch test series of allergens** (Sanming Hezhong Biotechnology Co., LTD., China).

|                                   |                                                    |
|-----------------------------------|----------------------------------------------------|
| <i>Potassium dichromate</i>       | <i>Colophony</i>                                   |
| <i>Fragrance mix</i>              | <i>Cobalt chloride</i>                             |
| <i>Camphor</i>                    | <i>Balsam of Peru</i>                              |
| <i>Thimerosal (Merthiolate)</i>   | <i>Para-phenylenediamine</i>                       |
| <i>Formaldehyde</i>               | <i>Sodium lauryl polyoxyethylene ether sulfate</i> |
| <i>Pentadiene carboxylic acid</i> | <i>Methyl p-hydroxybenzoate</i>                    |
| <i>Epoxy resin</i>                | <i>Ethyl p-hydroxybenzoate</i>                     |
| <i>Methylbenzene</i>              | <i>Propyl p-hydroxybenzoate</i>                    |
| <i>Dimethylbenzene</i>            | <i>Butyl p-hydroxybenzoate</i>                     |
| <i>Nickel sulfate</i>             | <i>Benzyl p-hydroxybenzoate</i>                    |

### Figure Legends

**Figure S1 (A and B):** A patch test series was performed (A). After 24 hours, the patch was removed and a preliminary reading of the skin was done. The final reading was performed after 48 hours from the patch application. The test was positive for nickel sulfate [from + after 24 hours to ++ after 48 hours (B, the spot after 48 hours, green arrow)].

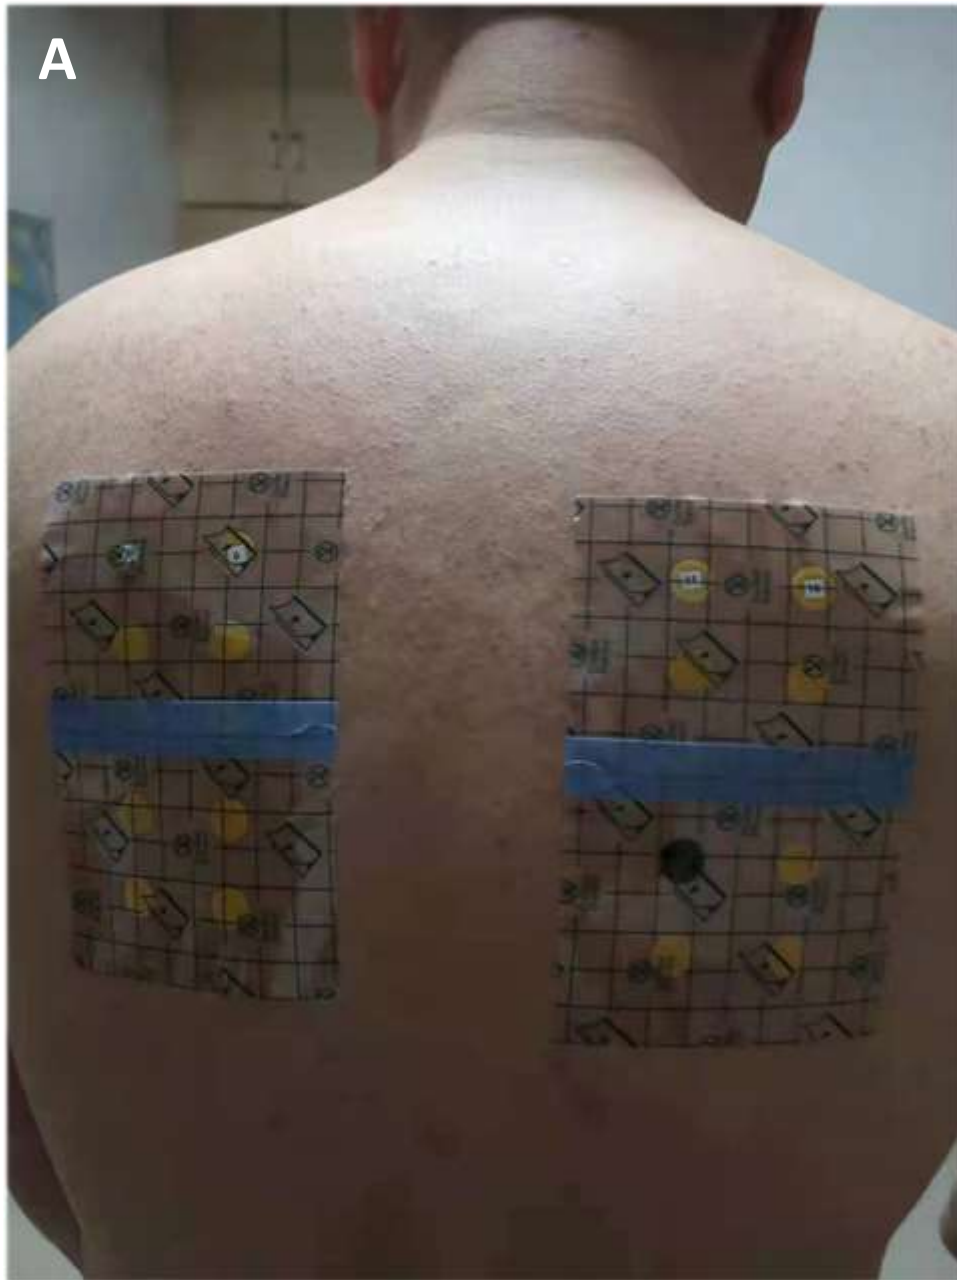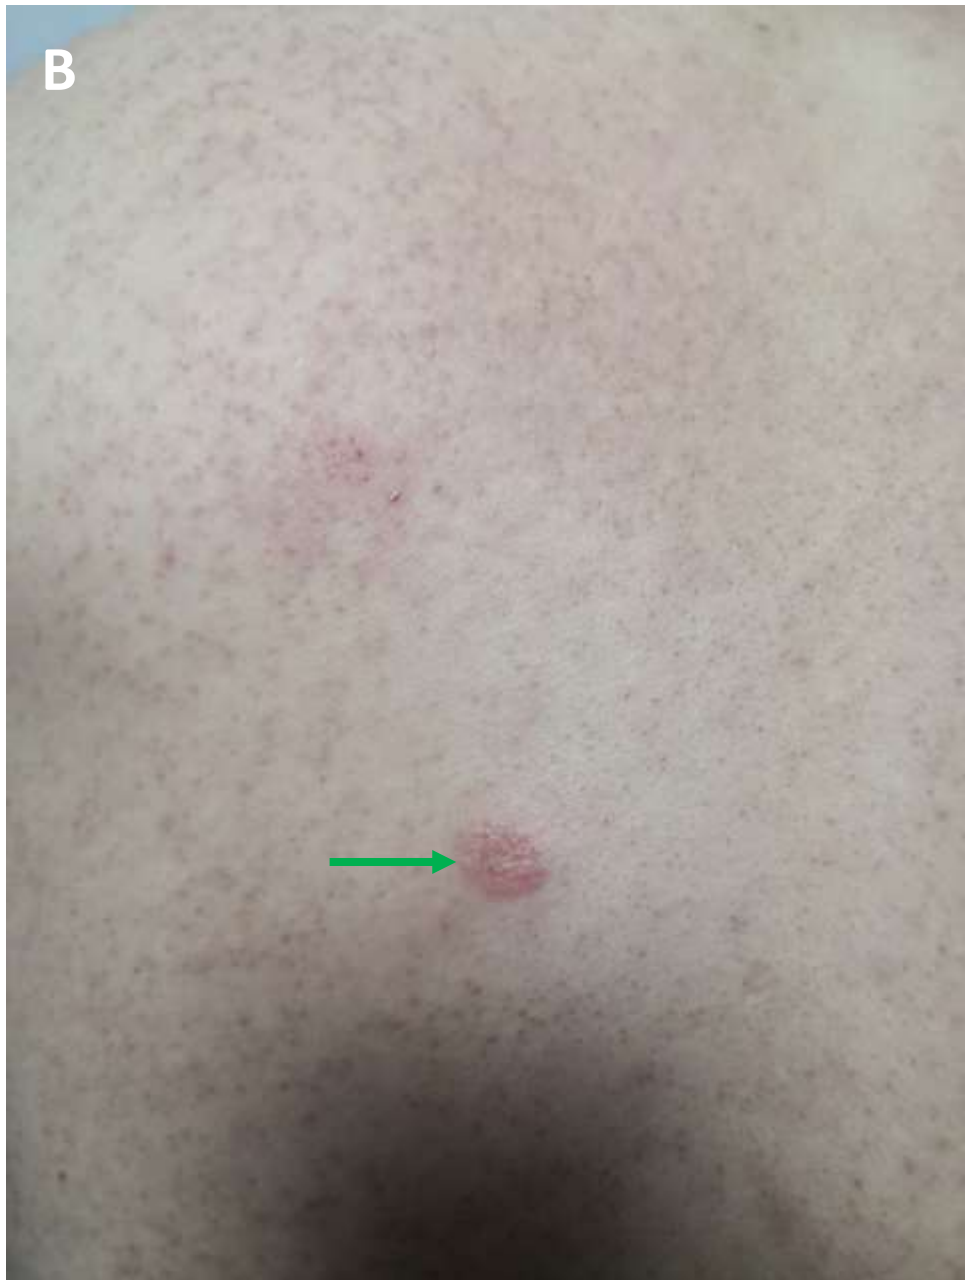

Appendix 1, as submitted by the authors. Appendix to: Zhu M, Vinturache A, Ding G. Nickel allergic contact dermatitis. *CMAJ* 2022. doi: 10.1503/cmaj.220260. Copyright © 2022 The Author(s) or their employer(s). To receive this resource in an accessible format, please contact us at [cmajgroup@cmaj.ca](mailto:cmajgroup@cmaj.ca).
